# Supplementary material for: A 2,2′-bipyridine coordination complex of [ICl2]+
Source: Royal Society of Chemistry journal article supplement (doi:10.1039/c4dt03549f), 2014-11-24
Supplement: c4dt03549f1.pdf [file c4dt03549f1.pdf]

## *Supporting Information for:*

### **A 2,2'-bipyridine coordination complex of [ICl<sub>2</sub>]<sup>+</sup>**

*Andrew J. M. Shaw, Robert Corbo, David J. D. Wilson,\* and Jason L. Dutton\**

Department of Chemistry, La Trobe Institute for Molecular Science, La Trobe University,  
Melbourne, Victoria, Australia, 3086

[j.dutton@latrobe.edu.au](mailto:j.dutton@latrobe.edu.au) , [david.wilson@latrobe.edu.au](mailto:david.wilson@latrobe.edu.au)

#### **Experimental Procedures:**

All manipulations involving ICl<sub>3</sub> or **5** were performed in an N<sub>2</sub> filled glovebox. Dichloromethane, MeCN, and Et<sub>2</sub>O, were obtained from Caledon Laboratories and dried using an Innovative Technologies Solvent Purification System with dual columns packed with solvent appropriate drying agents. The dried solvents were stored under an N<sub>2</sub> atmosphere over 3 Å molecular sieves in the glovebox. Solvents for NMR spectroscopy (CDCl<sub>3</sub>, CD<sub>3</sub>CN) were purchased from Cambridge Isotope Laboratories and dried by stirring for three days over CaH<sub>2</sub>, distilled and stored in the glovebox over 3 Å molecular sieves. Reagents were purchased from Alfa Aesar, Precious Metals Online (Au powder) or Aldrich (ICl<sub>3</sub>) and used as received. Compound **7** was prepared via literature procedure, using tht-AuCl in place of Me<sub>2</sub>S-AuCl and 1,3-diisopropylbenzamidozolium iodide in place of 1,3-diisopropylbenzamidozolium bromide.<sup>1</sup> Compound **6**, for comparison to compound **5** in terms of spectroscopic and reaction properties, was prepared via literature procedure.<sup>2</sup>

**Synthesis of 5:** A solution of bpy (0.033 g, 0.214 mmol: 5 mL CH<sub>2</sub>Cl<sub>2</sub>) was added to a freshly prepared solution of ICl<sub>3</sub> (0.100 g, 0.429 mmol: 5 mL CH<sub>2</sub>Cl<sub>2</sub>), which resulted in the immediate precipitation of a bright yellow solid. The solution was cooled to -40° resulting in the precipitation of further amounts of yellow solid. The supernatant was decanted and the solids washed with Et<sub>2</sub>O (2 × 5ml), then dried *in vacuo*, which gave **5** as a bright yellow powder.

Yield: 0.075 g (56%);  $^1\text{H}$  NMR ( $\text{CDCl}_3$ )  $\delta$  = 8.94 (d,  $^3J_{\text{H-H}}$  5.5 Hz, 2 H), 8.13 (t,  $^3J_{\text{H-H}}$  7.5 Hz, 2 H), 7.75, (d,  $^3J_{\text{H-H}}$  8.0 Hz, 2 H), 7.55, (t,  $^3J_{\text{H-H}}$  5.5 Hz 2 H);  $^{13}\text{C}$  NMR ( $\text{CDCl}_3$ )  $\delta$  = 155.3, 150.3, 139.4, 126.1, 125.5.

Generation of **8** using **5**: A solution of **7** (0.074 g, 0.160 mmol; 5 mL  $\text{CH}_2\text{Cl}_2$ ) was added to a slurry of **5** (0.05 g, 0.08 mmol; 5 mL  $\text{CH}_2\text{Cl}_2$ ) resulting in a red slurry. After 5 minutes the mixture was centrifuged and the solution transferred to a fresh vial. The volume of solution was reduced by half under vacuum, and then  $\text{Et}_2\text{O}$  (10 mL) was added giving an orange precipitate. The mixture was centrifuged, the supernatant was decanted and the solids were washed with  $\text{Et}_2\text{O}$  (3 x 5 mL). The orange solid was then dried under vacuum giving **8** as an orange powder. Yield: 0.061 g (75%).  $^1\text{H}$  NMR spectroscopic data were consistent with literature values,<sup>3</sup> and a unit cell analysis of single crystals grown from  $\text{CH}_2\text{Cl}_2$  solution gave identical parameters to the reported compound.

Generation of  $[\text{nBu}_4\text{N}][\text{ICl}_4]$ : A solution of  $[\text{nBu}_4\text{N}][\text{Cl}]$  (0.036 g, 0.133 mmol; 2 mL  $\text{CDCl}_3$ ) was added to a solution of  $\text{ICl}_3$  (0.031 g, 0.133 mmol; 2 mL  $\text{CDCl}_3$ ) resulting in an immediate colour change from orange to yellow. The solution was held at  $-40^\circ\text{C}$  resulting in the formation of single crystals, for which X-ray diffraction studies confirmed generation of  $[\text{nBu}_4\text{N}][\text{ICl}_4]$ . Solutions of  $[\text{nBu}_4\text{N}][\text{ICl}_4]$  generated *in situ* in  $\text{CDCl}_3$  as described above were used for the control oxidative chlorination experiments.

Reaction of  $[\text{nBu}_4\text{N}][\text{ICl}_4]$  with **7**

A solution of  $[\text{nBu}_4\text{N}][\text{ICl}_4]$  (0.120 mmol; 2 mL  $\text{CDCl}_3$ ) was added to a solution of **7** (0.052 g, 0.120 mmol) resulting in an immediate colour change to dark orange. After 30 minutes an aliquot was removed for  $^1\text{H}$  NMR spectroscopy which showed complete conversion to **8**.

Reaction of  $\text{ICl}_3$  with **7**

A solution of  $\text{ICl}_3$  (0.040 g 0.172 mmol; 2 mL  $\text{CDCl}_3$ ) was added to a solution of **7** (0.074 g, 0.172 mmol). After 30 minutes an aliquot was removed for  $^1\text{H}$  NMR spectroscopy which showed complete conversion to **8**.

#### Reaction of [<sup>n</sup>Bu<sub>4</sub>N][ICl<sub>4</sub>] with PhI

Neat PhI (0.325 mmol, 36 uL) was added to a solution of [<sup>n</sup>Bu<sub>4</sub>N][ICl<sub>4</sub>] (0.325 mmol; 4 mL CDCl<sub>3</sub>). After 30 minutes an aliquot was removed for <sup>1</sup>H NMR spectroscopy.

#### Reaction of ICl<sub>3</sub> with PhI

Neat PhI (0.236 mmol, 26 uL) was added to a solution of ICl<sub>3</sub> (0.055 g, 0.236 mmol; 3 mL CDCl<sub>3</sub>). After 30 minutes an aliquot was removed for <sup>1</sup>H NMR spectroscopy.

#### Reaction of **5** with PhI

Neat PhI (0.347 mmol, 39 uL) was added to a slurry of **5** (0.216 g, 0.347 mmol; 5 mL CDCl<sub>3</sub>). After 30 minutes an aliquot was removed for <sup>1</sup>H NMR spectroscopy.

#### Reaction of **6** with PhI

Neat PhI (0.173 mmol, 19 uL) was added to a solution of **6** (0.83 g, 0.173 mmol; 3 mL CDCl<sub>3</sub>). After 30 minutes an aliquot was removed for <sup>1</sup>H NMR spectroscopy.

### **X-ray crystallography**

Single crystals were selected under Paratone-N oil, mounted on nylon loops and placed into a cold stream (172 K) of N<sub>2</sub> on an Oxford CCD diffractometer using Mo K $\alpha$  radiation. Structure solution and refinement were performed using the SHELXTL suite of software. Structure and refinement information are found in Table 1.

**Table S1:** X-ray refinement details for single crystal X-ray structural determinations.

| Compound                             | <b>5</b>                                                                     | <b>[bipyH][ICl<sub>2</sub>]</b>                                              | <b>[<sup>n</sup>Bu<sub>4</sub>N][ICl<sub>4</sub>]</b>                         |
|--------------------------------------|------------------------------------------------------------------------------|------------------------------------------------------------------------------|-------------------------------------------------------------------------------|
| Empirical formula                    | C <sub>10</sub> H <sub>8</sub> N <sub>2</sub> I <sub>2</sub> Cl <sub>6</sub> | C <sub>10</sub> H <sub>9</sub> Cl <sub>2</sub> I <sub>1</sub> N <sub>2</sub> | C <sub>16</sub> H <sub>35</sub> Cl <sub>4</sub> I <sub>1</sub> N <sub>1</sub> |
| FW (g/mol)                           | 622.8                                                                        | 354.99                                                                       | 510.15                                                                        |
| Crystal system                       | Monoclinic                                                                   | Monoclinic                                                                   | Monoclinic                                                                    |
| Space group                          | P2(1)/n                                                                      | P2(1)/c                                                                      | P2(1)/n                                                                       |
| <i>a</i> (Å)                         | 8.056(2)                                                                     | 11.666(2)                                                                    | 14.863(3)                                                                     |
| <i>b</i> (Å)                         | 13.093(3)                                                                    | 7.914(2)                                                                     | 8.754(2)                                                                      |
| <i>c</i> (Å)                         | 16.894(3)                                                                    | 13.981(3)                                                                    | 18.783(4)                                                                     |
| $\alpha$ (deg)                       | 90                                                                           | 90                                                                           | 90                                                                            |
| $\beta$ (deg)                        | 97.39(3)                                                                     | 97.62(3)                                                                     | 108.06(3)                                                                     |
| $\gamma$ (deg)                       | 90                                                                           | 90                                                                           | 90                                                                            |
| <i>V</i> (Å <sup>3</sup> )           | 1767.2                                                                       | 1279.4(4)                                                                    | 2323.4(8)                                                                     |
| <i>Z</i>                             | 4                                                                            | 4                                                                            | 4                                                                             |
| <i>R</i> (int)                       | 0.0254                                                                       | 0.0279                                                                       | 0.0476                                                                        |
| <i>R</i> 1[ <i>I</i> >2 $\sigma$ ]   | 0.0273                                                                       | 0.0226                                                                       | 0.0401                                                                        |
| <i>wR</i> 2( <i>F</i> <sup>2</sup> ) | 0.0557                                                                       | 0.0515                                                                       | 0.1049                                                                        |
| GOF ( <i>S</i> )                     | 1.044                                                                        | 1.082                                                                        | 1.037                                                                         |

## Computational details:

Unless noted, all calculations were carried out within Gaussian 09.<sup>4</sup> Geometries of all species were optimized with the B3LYP density functional<sup>5-7</sup> in conjunction with the def2-TZVP basis set,<sup>8</sup> which includes an effective core potential in the case of iodine. While relativistic effects are not treated explicitly, the def2-TZVP effective core potential for iodine implicitly accounts for relativistic effects. Stationary points were characterised as minima by calculating the Hessian matrix analytically at the same level of theory. Thermodynamic corrections were taken from these calculations (standard state of  $T = 298.15$  K and  $p = 1$  atm). Natural bond orbital (NBO) analysis was carried out with NBO 5.<sup>9</sup> at the B3LYP/def2-TZVP level of theory. EDA and EDA-NOCV calculations were performed using the ADF package<sup>10</sup> at the BP86/TZ2P level of theory, inclusive of ZORA relativistic effects.

## Cartesian coordinates of optimized geometries

### 5 (bpy-ICl<sub>2</sub><sup>+</sup>)

B3LYP/def2-TZVP optimized geometry (Å).

|    |          |           |           |
|----|----------|-----------|-----------|
| 1  | 1        |           |           |
| 7  | 0.000000 | 1.364654  | -0.784001 |
| 6  | 0.000000 | 2.696757  | -0.699917 |
| 6  | 0.000000 | 3.497874  | -1.829884 |
| 6  | 0.000000 | 2.882744  | -3.073074 |
| 6  | 0.000000 | 1.497821  | -3.148690 |
| 6  | 0.000000 | 0.740546  | -1.978666 |
| 6  | 0.000000 | -0.740546 | -1.978666 |
| 6  | 0.000000 | -2.696757 | -0.699917 |
| 6  | 0.000000 | -3.497874 | -1.829884 |
| 6  | 0.000000 | -2.882744 | -3.073074 |
| 6  | 0.000000 | -1.497821 | -3.148690 |
| 1  | 0.000000 | -1.017234 | -4.114725 |
| 1  | 0.000000 | -3.473192 | -3.979601 |
| 1  | 0.000000 | -4.573711 | -1.726752 |
| 1  | 0.000000 | -3.119244 | 0.296738  |
| 1  | 0.000000 | 1.017234  | -4.114725 |
| 1  | 0.000000 | 3.473192  | -3.979601 |
| 1  | 0.000000 | 4.573711  | -1.726752 |
| 1  | 0.000000 | 3.119244  | 0.296738  |
| 7  | 0.000000 | -1.364654 | -0.784001 |
| 53 | 0.000000 | 0.000000  | 1.223118  |
| 17 | 0.000000 | 1.863062  | 2.763595  |
| 17 | 0.000000 | -1.863062 | 2.763595  |

### C<sub>6</sub>F<sub>6</sub>-IF<sub>2</sub>-ICl<sub>2</sub> complex

B3LYP/def2-TZVP optimized geometry (Å).

|    |           |           |           |
|----|-----------|-----------|-----------|
| 0  | 1         |           |           |
| 53 | 0.000000  | 0.000000  | 0.010119  |
| 9  | 0.000000  | 2.002367  | -0.278150 |
| 9  | 0.000000  | -2.002367 | -0.278150 |
| 9  | -2.347328 | -0.297913 | -2.172959 |
| 9  | -2.336217 | -0.298250 | -4.869383 |
| 9  | 0.000000  | 0.000000  | -6.219728 |
| 9  | 2.336217  | 0.298250  | -4.869383 |
| 9  | 2.347328  | 0.297913  | -2.172959 |
| 6  | 0.000000  | 0.000000  | -2.103573 |
| 6  | -1.183557 | -0.151436 | -2.809438 |
| 6  | -1.193502 | -0.153228 | -4.197000 |
| 6  | 0.000000  | 0.000000  | -4.889308 |
| 6  | 1.193502  | 0.153228  | -4.197000 |
| 6  | 1.183557  | 0.151436  | -2.809438 |
| 7  | 0.112126  | 1.363714  | 2.655986  |
| 7  | -0.112126 | -1.363714 | 2.655986  |
| 6  | 0.362684  | 2.670821  | 2.611460  |
| 1  | 0.309214  | 3.120721  | 1.628049  |
| 6  | 0.678778  | 3.420455  | 3.738206  |
| 1  | 0.873659  | 4.480673  | 3.650106  |
| 6  | 0.746577  | 2.768840  | 4.960054  |
| 1  | 1.006696  | 3.307498  | 5.862503  |
| 6  | 0.483318  | 1.408791  | 5.011467  |
| 1  | 0.553169  | 0.883571  | 5.952688  |
| 6  | 0.154481  | 0.728891  | 3.834989  |
| 6  | -0.154481 | -0.728891 | 3.834989  |
| 6  | -0.483318 | -1.408791 | 5.011467  |
| 1  | -0.553169 | -0.883571 | 5.952688  |
| 6  | -0.746577 | -2.768840 | 4.960054  |
| 1  | -1.006696 | -3.307498 | 5.862503  |
| 6  | -0.678778 | -3.420455 | 3.738206  |
| 1  | -0.873659 | -4.480673 | 3.650106  |
| 6  | -0.362684 | -2.670821 | 2.611460  |
| 1  | -0.309214 | -3.120721 | 1.628049  |

**EDA-NOCV analysis.** Deformation densities  $\Delta\rho$  associated with the most important orbital interactions in 5, [pyr-I-pyr]<sup>+</sup> and C<sub>6</sub>F<sub>5</sub>IF<sub>2</sub>-bpy. The direction of the charge flow is red→blue. The B3LYP/TZ2P energy of interaction (kJ/mol) and the percentage contribution to the total orbital interaction ( $\Delta E_{\text{orb}}$ ) are given.

|                | 5                                                                                                           | [IPyr <sub>2</sub> ] <sup>+</sup>                                                                                        | C <sub>6</sub> F <sub>5</sub> IF <sub>2</sub> -bpy                                                           |
|----------------|-------------------------------------------------------------------------------------------------------------|--------------------------------------------------------------------------------------------------------------------------|--------------------------------------------------------------------------------------------------------------|
| $\Delta\rho_1$ | 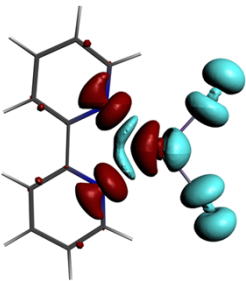<br>-202.1 kJ/mol (43.2%)  | <br>-428.3 kJ/mol (63.3%)              | <br>-37.2 kJ/mol (49.5%)  |
| $\Delta\rho_2$ | <br>-154.5 kJ/mol (33.0%) | <br>-93.0 kJ/mol (13.8%)              | <br>-17.9 kJ/mol (23.8%) |
| $\Delta\rho_3$ | <br>-25.5 kJ/mol (5.4%)  | <br>-31.3 kJ/mol (9.3%) <sup>a</sup> |                         |
| $\Delta\rho_4$ | <br>-20.9 kJ/mol (4.5%)  | <br>-15.3 kJ/mol (4.5%) <sup>a</sup> |                                                                                                              |

<sup>a</sup> Degenerate interactions are overlaid on the one plot, with the percentage including both degenerate interactions.



**Figure S1.** Proton-NMR spectrum (CDCl<sub>3</sub>) of **5**.

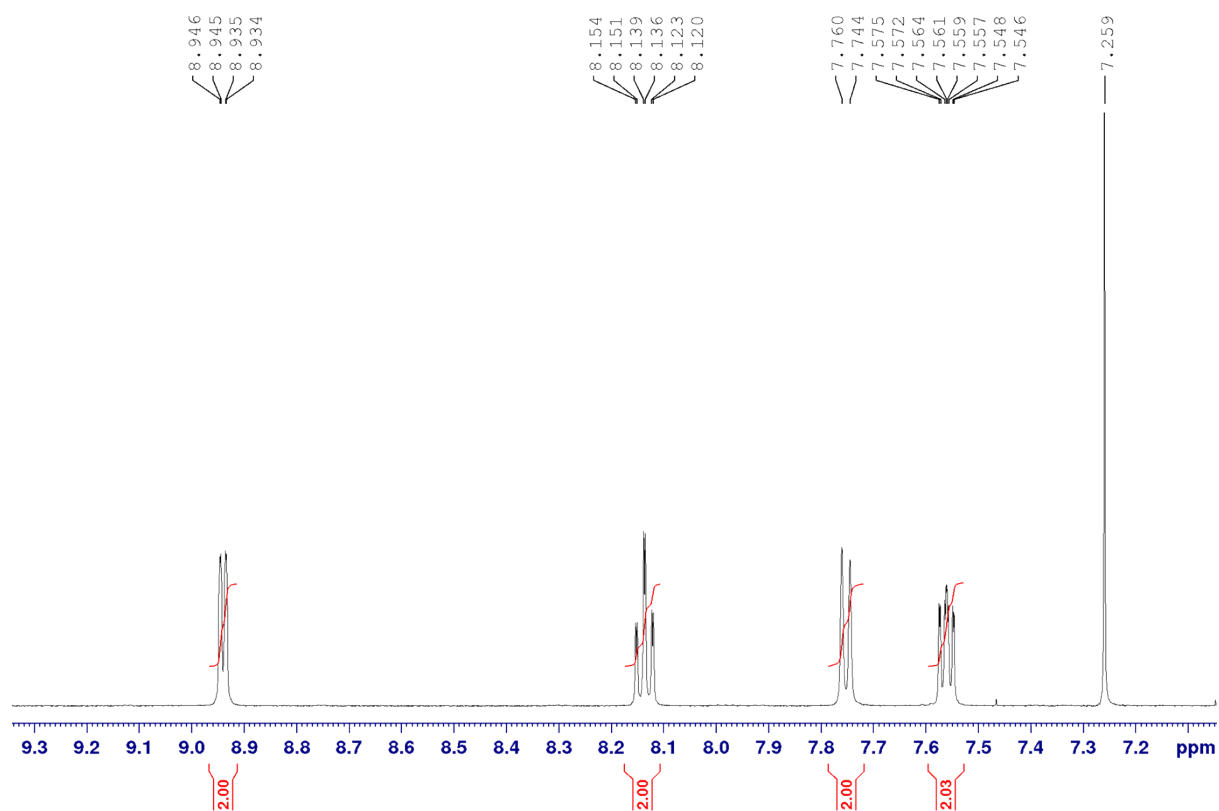

**Figure S2.** Carbon-13 NMR spectrum (CDCl<sub>3</sub>) of **5**.

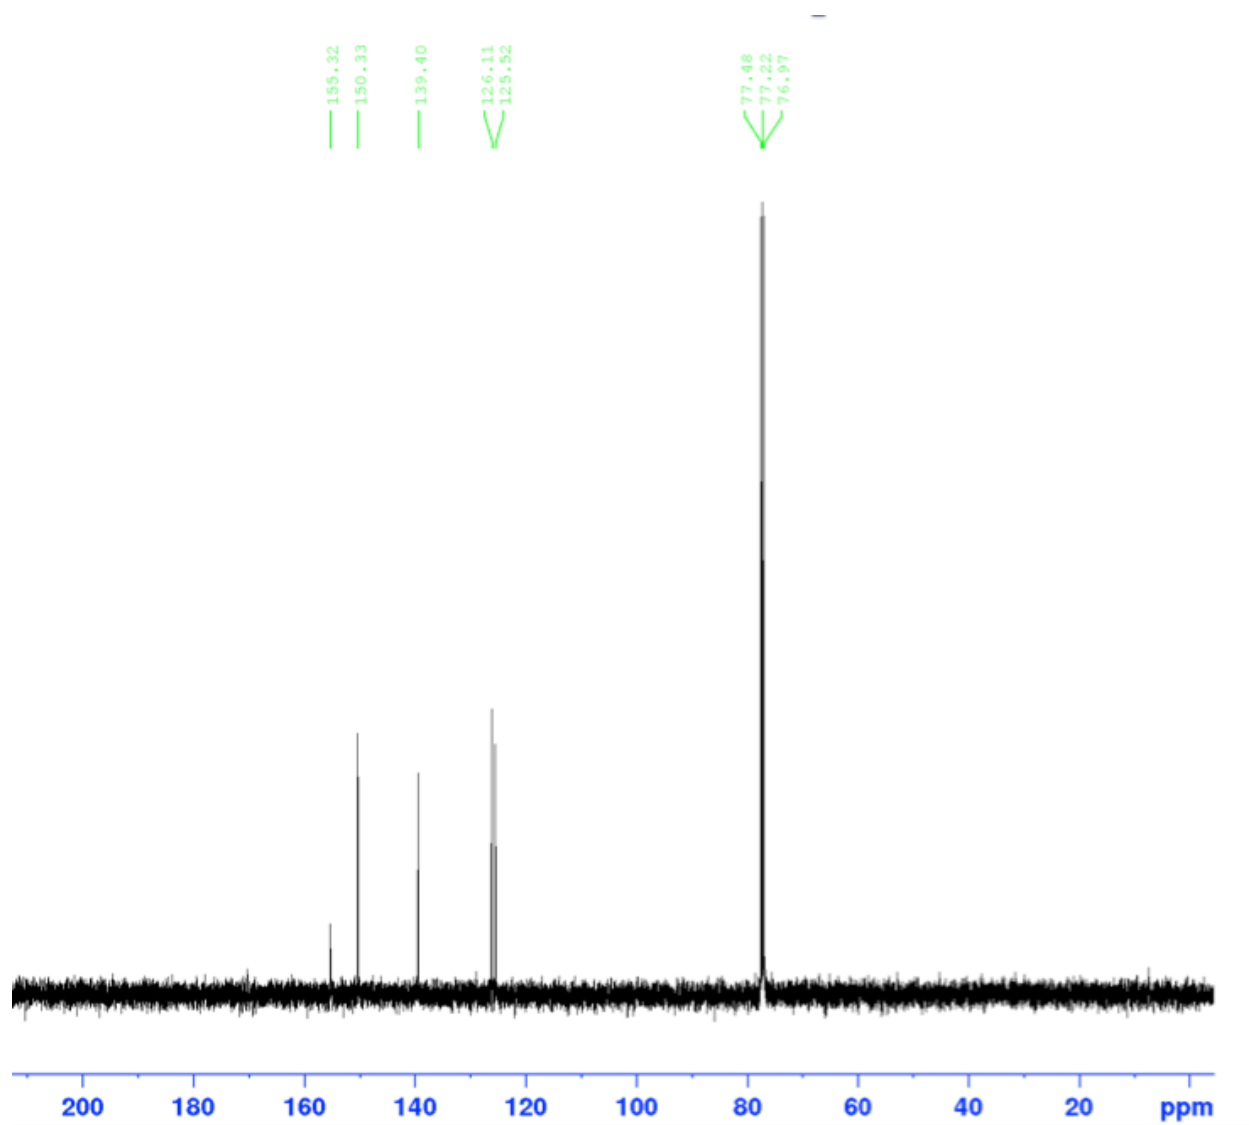

**Figure S3.** Proton NMR spectrum (CDCl<sub>3</sub>) of **6**.

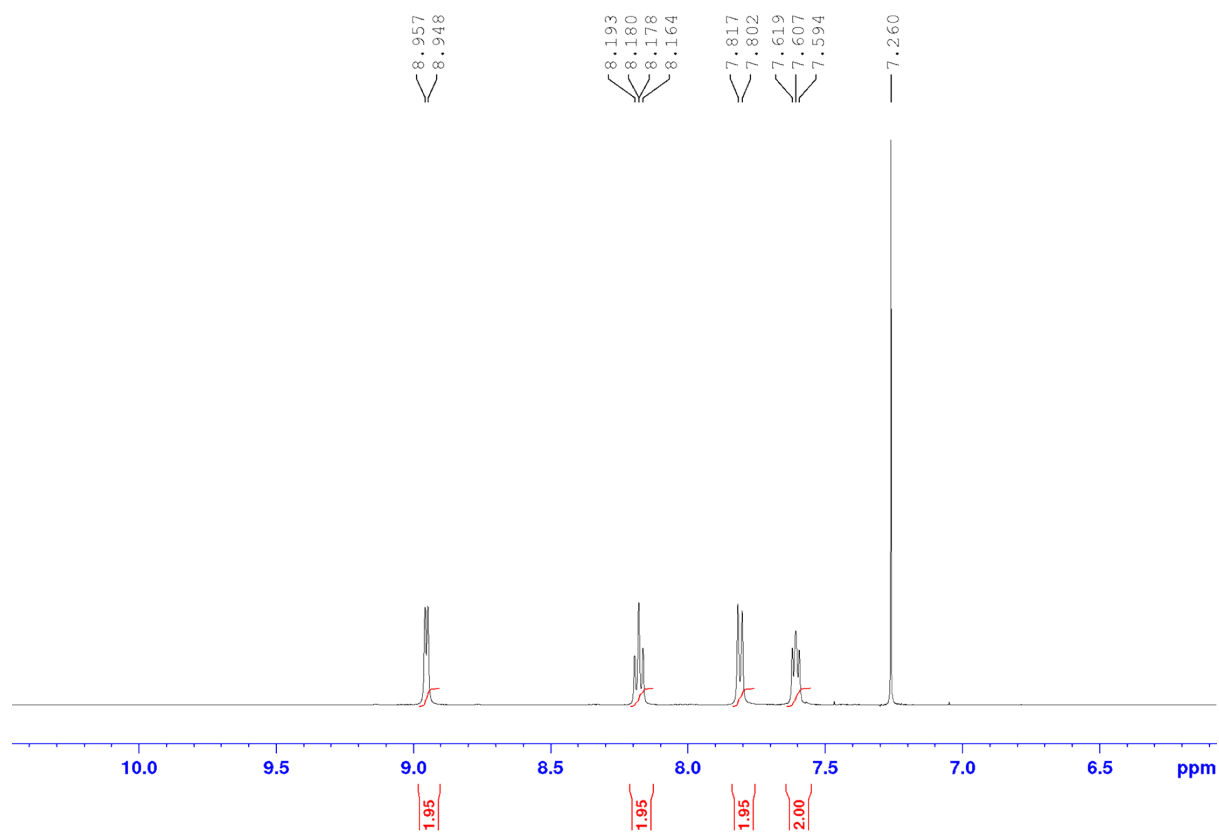

**Figure S4.** Superimposed <sup>1</sup>H NMR spectra (CDCl<sub>3</sub>) of **5** and **6**.

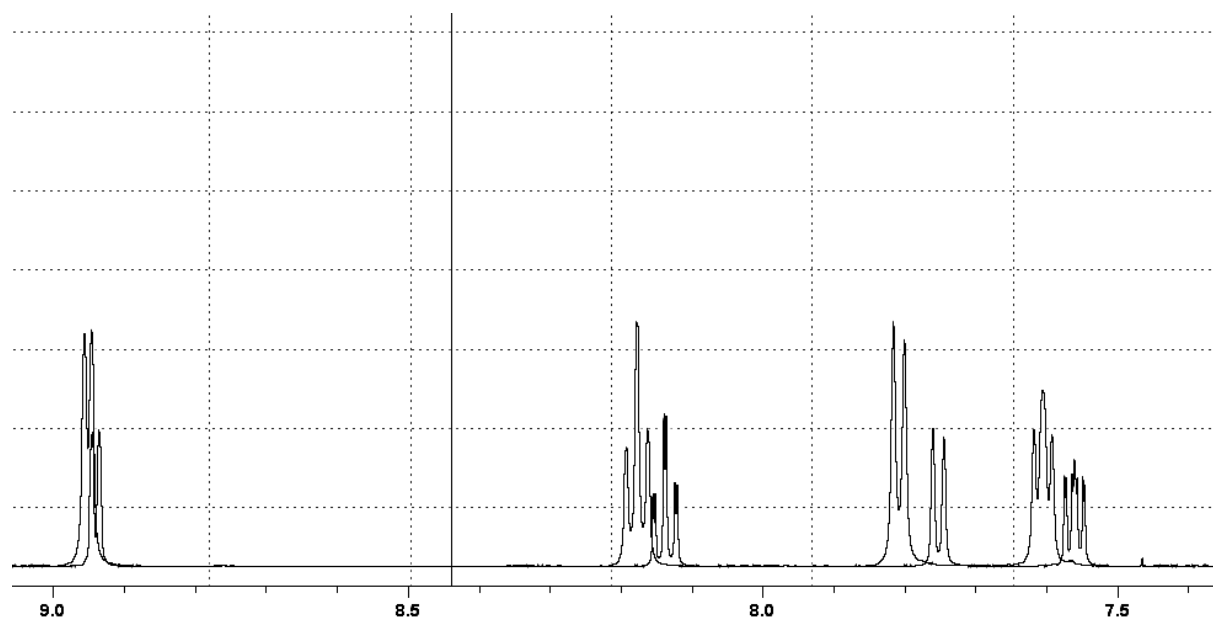

**Figure S5.** Proton NMR spectrum of **5** five minutes after being dissolved in CD<sub>3</sub>CN.

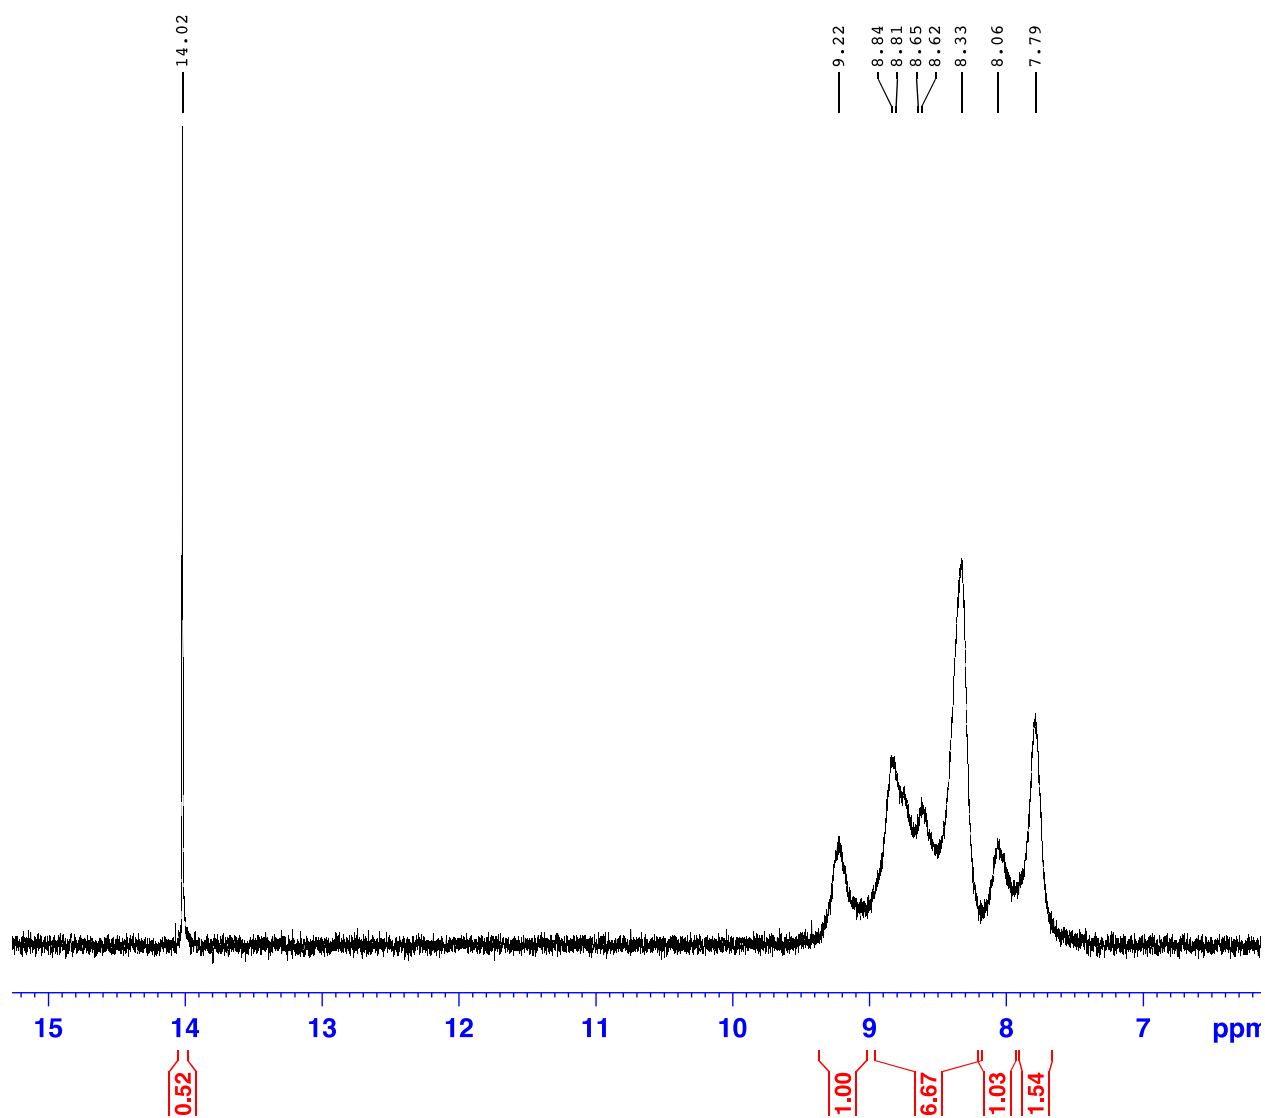

**Figure S6.** Proton NMR spectrum of **5** one hour after being dissolved in CD<sub>3</sub>CN.

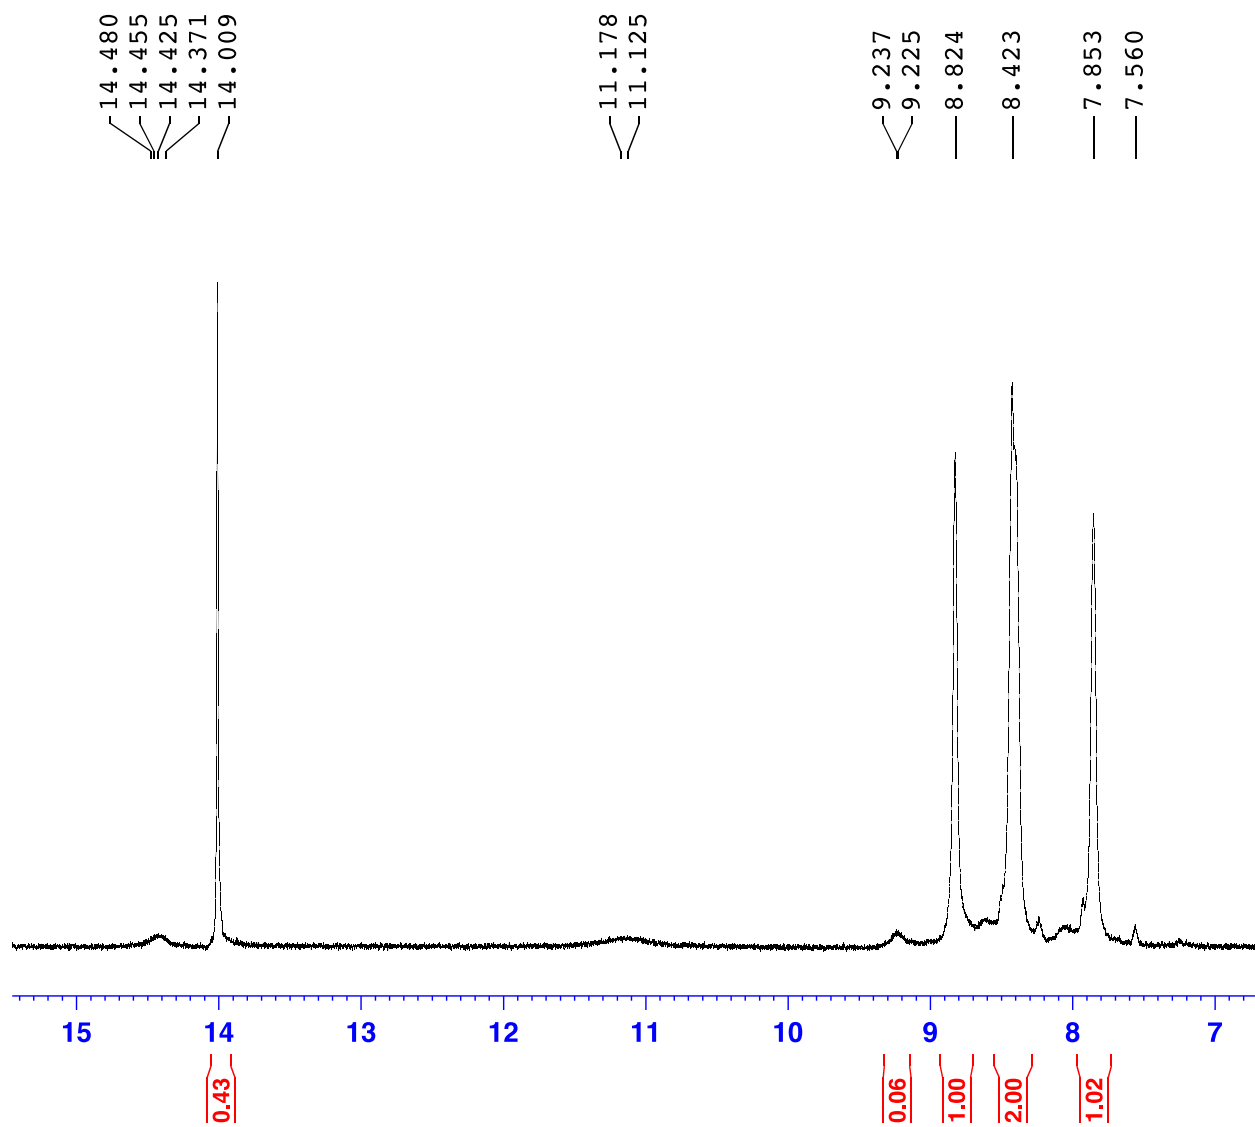

**Figure S7.** Proton NMR spectrum (CDCl<sub>3</sub>) of [Hbpy][Cl], generated from bipyridine and one equivalent of ethereal HCl.

hcl + bipy, white solid  
4/9/14

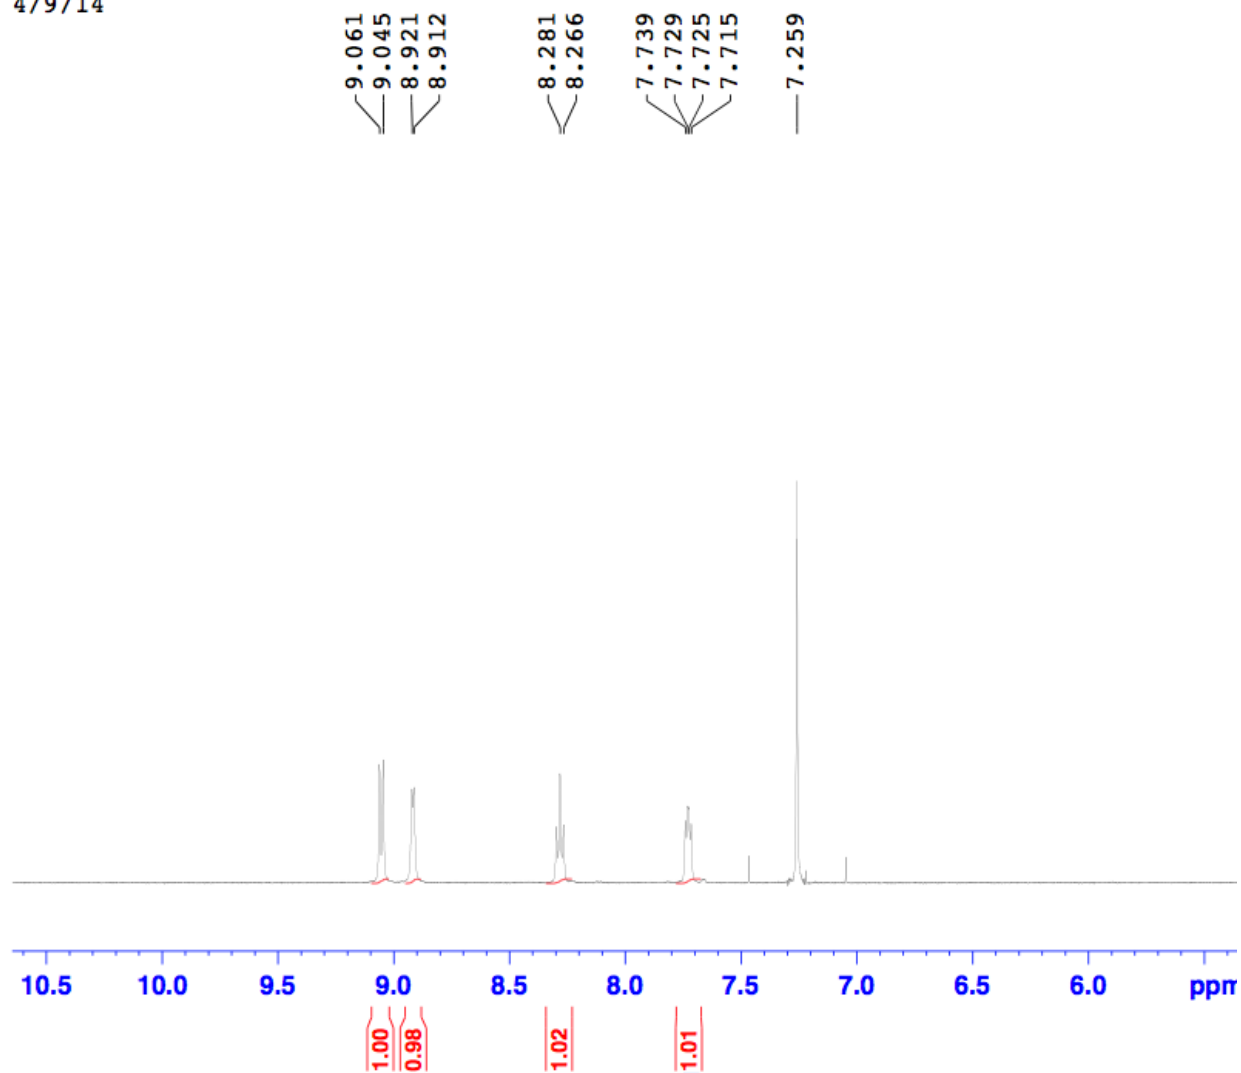

**Figure S8.** FT-IR spectra (KBr pellets) of **5** prepared under N<sub>2</sub> (top) and prepared in the ambient atmosphere resulting in 5 minutes of exposure to air (bottom).

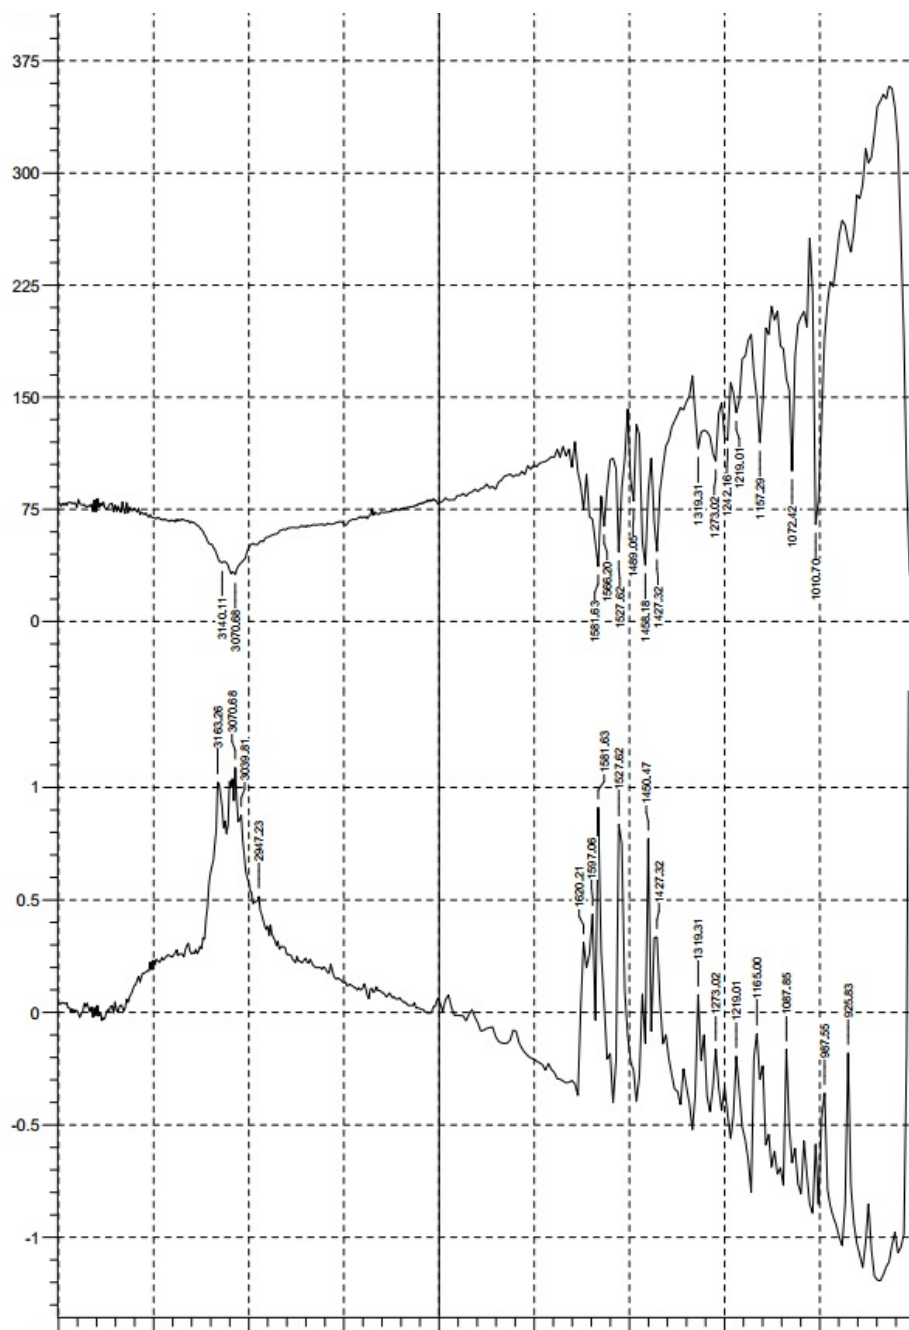

**Table S2.** Raw FT-IR peak table for sample of **5** prepared under N<sub>2</sub>.

|    | <b>Peak</b> | <b>Intensity</b> | <b>Corr. Inte</b> | <b>Base (H)</b> | <b>Base (L)</b> | <b>Area</b> | <b>Corr. Are</b> |
|----|-------------|------------------|-------------------|-----------------|-----------------|-------------|------------------|
| 1  | 1010.7      | 64.9812          | 182.9953          | 1026.13         | 972.12          | -9.1201     | 11.545           |
| 2  | 1072.42     | 100.8014         | 106.5585          | 1111            | 1041.56         | -16.2278    | 5.7668           |
| 3  | 1157.29     | 119.5909         | 75.0724           | 1180.44         | 1141.86         | -7.189      | 3.9334           |
| 4  | 1219.01     | 139.6862         | 29.4402           | 1234.44         | 1180.44         | -11.6598    | 1.5052           |
| 5  | 1242.16     | 121.3621         | 34.0323           | 1257.59         | 1234.44         | -2.7604     | 1.5133           |
| 6  | 1273.02     | 107.1293         | 33.0758           | 1303.88         | 1257.59         | -4.291      | 2.0124           |
| 7  | 1319.31     | 115.4908         | 30.7155           | 1334.74         | 1303.88         | -3.6349     | 1.3505           |
| 8  | 1427.32     | 47.0796          | 68.9394           | 1442.75         | 1365.6          | -0.6456     | 6.8324           |
| 9  | 1458.18     | 37.6585          | 80.6011           | 1481.33         | 1442.75         | 4.4738      | 7.5257           |
| 10 | 1489.05     | 80.7302          | 54.4162           | 1504.48         | 1481.33         | -0.1515     | 2.995            |
| 11 | 1527.62     | 46.5626          | 75.6965           | 1543.05         | 1504.48         | 1.8626      | 5.5292           |
| 12 | 1566.2      | 63.7159          | 26.4797           | 1573.91         | 1543.05         | 1.7685      | 1.1761           |
| 13 | 1581.63     | 36.8965          | 49.8567           | 1612.49         | 1573.91         | 8.3244      | 6.7022           |
| 14 | 3070.68     | 31.391           | 13.1218           | 3124.68         | 2985.81         | 56.5082     | 9.3733           |
| 15 | 3140.11     | 39.3346          | 1.9268            | 3302.13         | 3132.4          | 46.1677     | -2.3794          |

**Table S3.** Raw FT-IR peak table for sample of **5** prepared in ambient atmosphere.

|    | <b>Peak</b> | <b>Intensity</b> | <b>Corr. Inte</b> | <b>Base (H)</b> | <b>Base (L)</b> | <b>Area</b> | <b>Corr. Are</b> |
|----|-------------|------------------|-------------------|-----------------|-----------------|-------------|------------------|
| 1  | 763.81      | 2.066            | 1.5964            | 779.24          | 748.38          | 24.1101     | 34.6271          |
| 2  | 925.83      | -0.1804          | 0.8845            | 941.26          | 887.26          | -45.711     | 12.9158          |
| 3  | 987.55      | -0.3591          | 0.5396            | 1002.98         | 941.26          | -48.3671    | 9.9549           |
| 4  | 1087.85     | -0.1657          | 0.5691            | 1095.57         | 1072.42         | -10.7961    | 5.8227           |
| 5  | 1165        | -0.0949          | 0.3704            | 1180.44         | 1157.29         | -6.5164     | 6.1829           |
| 6  | 1219.01     | -0.1954          | 0.4336            | 1234.44         | 1180.44         | -26.3535    | 10.3652          |
| 7  | 1273.02     | -0.1638          | 0.2746            | 1288.45         | 1257.59         | -9.7621     | 3.7668           |
| 8  | 1319.31     | 0.0781           | 0.3937            | 1334.74         | 1311.59         | -5.1176     | 3.3752           |
| 9  | 1427.32     | 0.3346           | 0.4467            | 1442.75         | 1411.89         | 4.7038      | 8.1646           |
| 10 | 1450.47     | 0.7713           | 0.8823            | 1458.18         | 1442.75         | 5.0935      | 6.8075           |
| 11 | 1527.62     | 0.8354           | 0.5964            | 1535.34         | 1481.33         | 5.4251      | 22.5592          |
| 12 | 1581.63     | 0.9104           | 0.9888            | 1589.34         | 1558.48         | 8.4649      | 12.2144          |
| 13 | 1597.06     | 0.437            | 0.394             | 1612.49         | 1589.34         | 6.0099      | 4.1094           |
| 14 | 1620.21     | 0.3116           | 0.3015            | 1635.64         | 1612.49         | 1.8076      | 3.7676           |
| 15 | 2947.23     | 0.5147           | 0.071             | 2970.38         | 2916.37         | 24.5328     | 1.3855           |
| 16 | 3039.81     | 0.877            | 0.1024            | 3055.24         | 2978.09         | 50.6836     | 1.466            |
| 17 | 3070.68     | 1.0886           | 0.179             | 3078.39         | 3055.24         | 22.2522     | 1.9196           |
| 18 | 3163.26     | 1.0232           | 0.394             | 3263.56         | 3116.97         | 96.9181     | 17.7626          |



**Figure S9.** Proton NMR spectrum (CDCl<sub>3</sub>) of the reaction mixture of **6** and PhI.

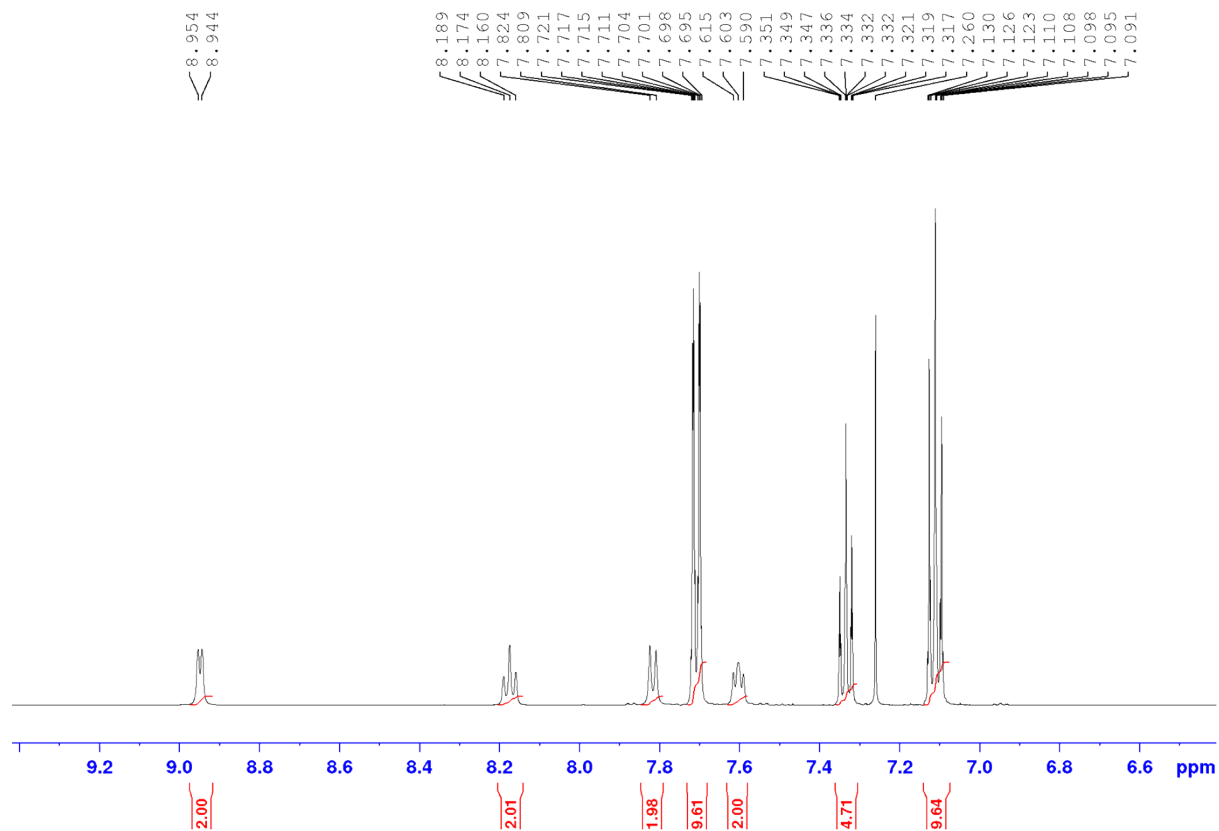

**Figure S10.** Proton NMR spectrum (CDCl<sub>3</sub>) of the reaction mixture of **5** and PhI.

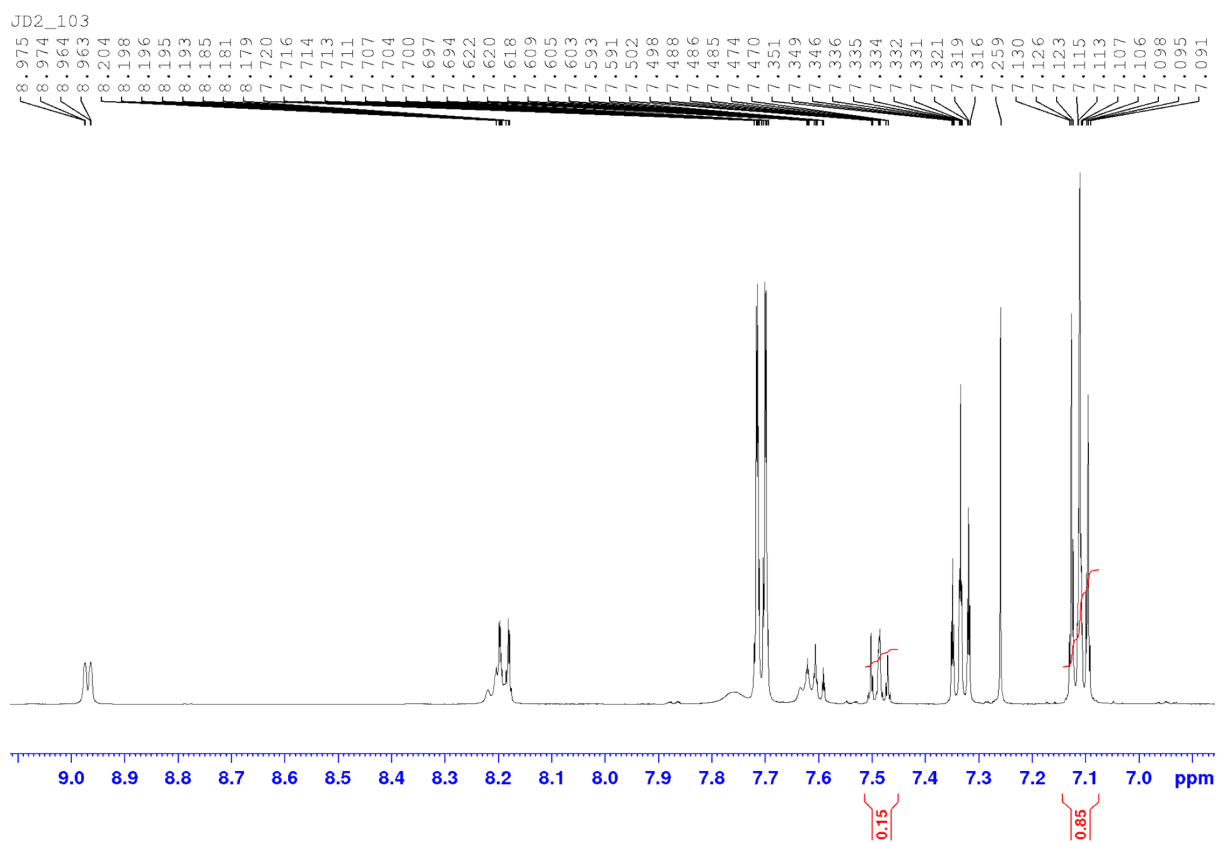

**Figure S11.** Proton NMR spectrum (CDCl<sub>3</sub>) of the reaction mixture of [nBu<sub>4</sub>N][ICl<sub>4</sub>] and PhI.

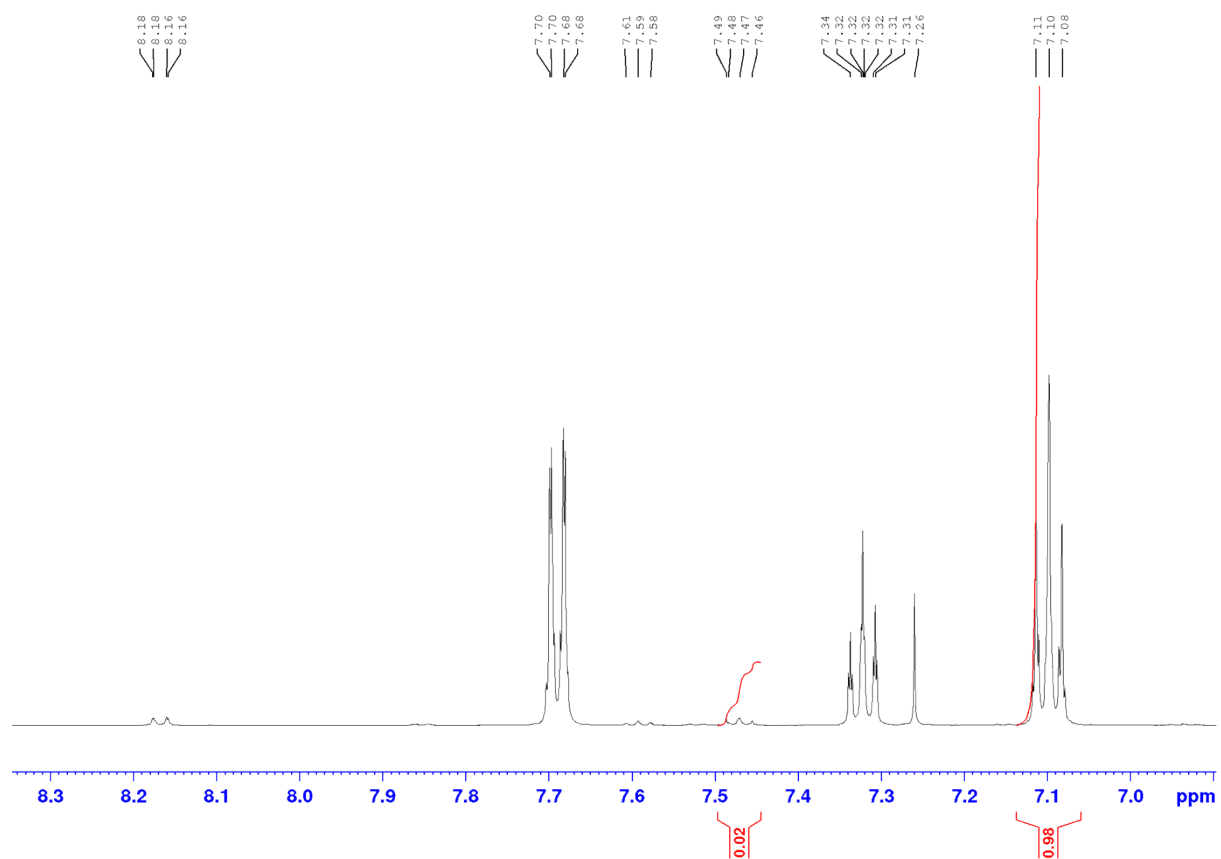

**Figure S12.** Proton NMR spectrum (CDCl<sub>3</sub>) of the reaction mixture of ICl<sub>3</sub> and PhI.

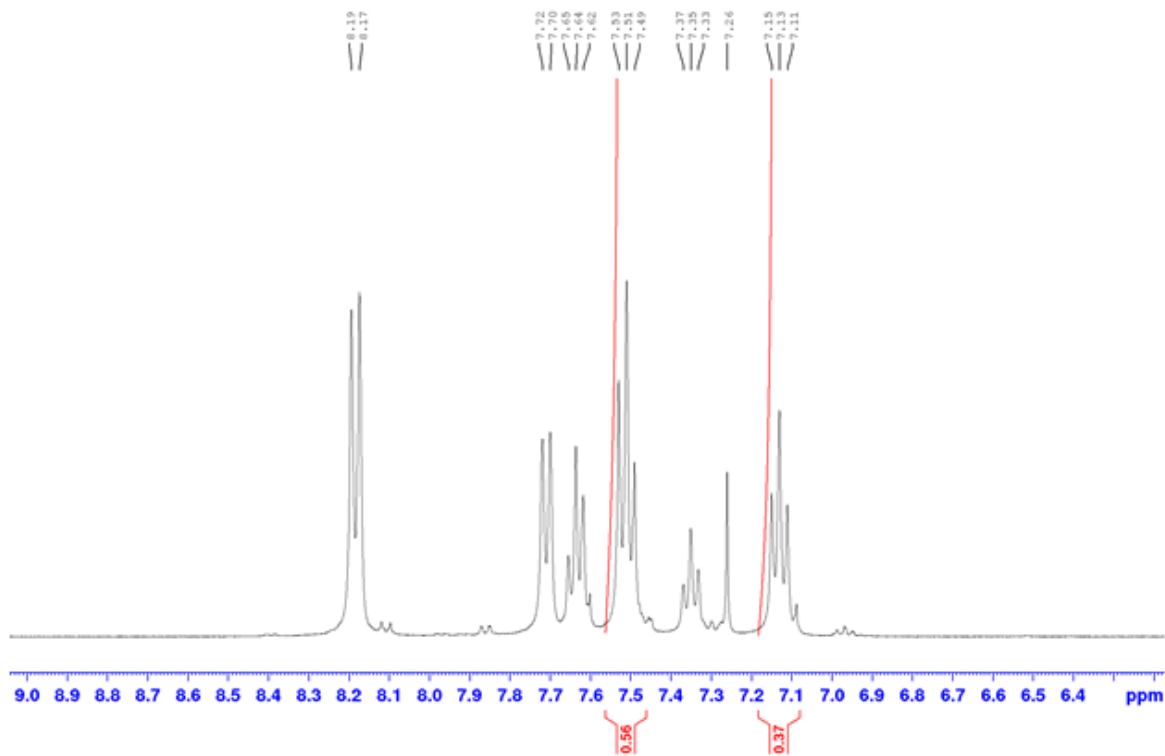

## References

- (1) Jothibasu, R.; Huynh, H. V.; Koh, L. L. *J. Organomet. Chem.* **2008**, *693*, 374.
- (2) Batsanov, A. S.; Howard, J. A. K.; Lightfoot, A. P.; Twiddle, S. J. R.; Whiting, A. *Eur. J. Org. Chem.* **2005**, 1876.
- (3) Sivaram, H.; Tan, J.; Huynh, H. V. *Organometallics* **2012**, *31*, 5875.
- (4) Frisch, M. J.; Trucks, G. W.; Schlegel, H. B.; Scuseria, G. E.; Robb, M. A.; Cheeseman, J. R.; Scalmani, G.; Barone, V.; Mennucci, B.; Petersson, G. A.; Nakatsuji, H.; Caricato, M.; Li, X.; Hratchian, H. P.; Izmaylov, A. F.; Bloino, J.; Zheng, G.; Sonnenberg, J. L.; Hada, M.; Ehara, M.; Toyota, K.; Fukuda, R.; Hasegawa, J.; Ishida, M.; Nakajima, T.; Honda, Y.; Kitao, O.; Nakai, H.; Vreven, T.; J. A. Montgomery, J.; Peralta, J. E.; Ogliaro, F.; Bearpark, M.; Heyd, J. J.; Brothers, E.; Kudin, K. N.; Staroverov, V. N.; Kobayashi, R.; Normand, J.; Raghavachari, K.; Rendell, A.; Burant, J. C.; Iyengar, S. S.; Tomasi, J.; Cossi, M.; Rega, N.; Millam, J. M.; Klene, M.; Knox, J. E.; Cross, J. B.; Bakken, V.; Adamo, C.; Jaramillo, J.; Gomperts, R.; Stratmann, R. E.; Yazyev, O.; Austin, A. J.; Cammi, R.; Pomelli, C.; Ochterski, J. W.; Martin, R. L.; Morokuma, K.; Zakrzewski, V. G.; Voth, G. A.; Salvador, P.; Dannenberg, J. J.; Dapprich, S.; Daniels, A. D.; Farkas, Ö.;

- Foresman, J. B.; Ortiz, J. V.; Cioslowski, J.; Fox, D. J.; Gaussian 09, Revision A.1, Gaussian, Inc.: Wallingford CT, 2009.
- (5) Becke, A. D. *Phys. Rev. A: Gen. Phys.* **1988**, *38*, 3098.
- (6) Becke, A. D. *Journal of Chemical Physics* **1993**, *98*, 5648.
- (7) Lee, C.; Yang, W.; Parr, R. G. *Phys. Rev. B: Condens. Matter* **1988**, *37*, 785.
- (8) Weigend, F.; Ahlrichs, R. *Phys. Chem. Chem. Phys.* **2005**, *7*, 3297.
- (9) E. D. Glendening; J. K. Badenhoop; A. E. Reed; J. E. Carpenter; J. A. Bohmann; C. M. Morales; Weinhold, F.; NBO 5.9. see <http://www.chem.wisc.edu/~nbo5>: Theoretical Chemistry Institute, University of Wisconsin, Madison, WI, 2011.
- (10) E.J. Baerends; T. Ziegler; J. Autschbach; D. Bashford; A. Bérces; F.M. Bickelhaupt; C. Bo; P.M. Boerrigter; L. Cavallo; D.P. Chong; L. Deng; R.M. Dickson; D.E. Ellis; M. van Faassen; L. Fan; T.H. Fischer; C. Fonseca Guerra; A. Ghysels; A. Giammona; S.J.A. van Gisbergen; A.W. Götz; J.A. Groeneveld; O.V. Gritsenko; M. Grüning; S. Gusarov; F.E. Harris; P. van den Hoek; C.R. Jacob; H. Jacobsen; L. Jensen; J.W. Kaminski; G. van Kessel; F. Kootstra; A. Kovalenko; M.V. Krykunov; E. van Lenthe; D.A. McCormack; A. Michalak; M. Mitoraj; J. Neugebauer; V.P. Nicu; L. Noodleman; V.P. Osinga; S. Patchkovskii; P.H.T. Philipsen; D. Post; C.C. Pye; W. Ravenek; J.I. Rodríguez; P. Ros; P.R.T. Schipper; G. Schreckenbach; J.S. Seldenthuis; M. Seth; J.G. Snijders; M. Solà; M. Swart; D. Swerhone; G. te Velde; P. Vernooijs; L. Versluis; L. Visscher; O. Visser; F. Wang; T.A. Wesolowski; E.M. van Wezenbeek; G. Wiesenekker; S.K. Wolff; T.K. Woo; Yakovlev, A. L. ADF2012, SCM, Theoretical Chemistry, Vrije Universiteit, Amsterdam, The Netherlands, <http://www.scm.com>.
